# Supplementary material for: Hybrid Classification/Regression Approach to QSAR Modeling of Stoichiometric Antiradical Capacity Assays’ Endpoints
Source: MDPI journal article supplement (doi:10.3390/molecules27072084), 2022-03-24
Supplement: s1 [file s1]

Supplementary Table S1. The compounds total OH-groups, OH-groups classified as active in radical scavenging reactions of ABTS and DPPH antiradical capacity assays by BDE, maxSD<sub>c</sub> and BDE×maxSD<sub>c</sub> and respective models correlation coefficients and slopes. The presented data are obtained for complete dataset in AM1 simulation without COSMO solvent effect corrections.

| compound                   | ABTS |     |                    |                        |      | DPPH |     |                    |                        |      |
|----------------------------|------|-----|--------------------|------------------------|------|------|-----|--------------------|------------------------|------|
|                            | nOH  | BDE | maxSD <sub>c</sub> | BDE×maxSD <sub>c</sub> | TEAC | nOH  | BDE | maxSD <sub>c</sub> | BDE×maxSD <sub>c</sub> | TEAC |
| 1,5-dihydroxyanthraquinone | 2    | 0   | 0                  | 0                      | 0.08 | 2    | 0   | 0                  | 0                      | 0.07 |
| 2,4-dihydroxybenzoic_acid  | 2    | 0   | 0                  | 0                      | 1.22 | 2    | 0   | 0                  | 0                      | 1.27 |
| 2,6-dihydroxyanthraquinone | 2    | 0   | 0                  | 0                      | 0.07 | 2    | 0   | 0                  | 0                      | 0.08 |
| 3-hydroxyflavon            | 1    | 1   | 0                  | 0                      | 0.71 | 1    | 1   | 0                  | 0                      | 0.48 |
| acetylshikonin             | 2    | 0   | 1                  | 2                      | 0.11 | 2    | 0   | 0                  | 1                      | 0.08 |
| alizarin                   | 2    | 1   | 1                  | 1                      | 1.07 | 2    | 1   | 1                  | 1                      | 1.05 |
| alizarin-2-glucoside       | 1    | 0   | 1                  | 1                      | 0.11 | 1    | 0   | 1                  | 1                      | 0.10 |
| aloe-emodin                | 2    | 0   | 0                  | 0                      | 0.08 | 2    | 0   | 0                  | 0                      | 0.04 |
| apigenin                   | 3    | 0   | 0                  | 0                      | 0.09 | 3    | 0   | 0                  | 0                      | 0.04 |
| apigetrin                  | 2    | 0   | 0                  | 0                      | 0.08 | 2    | 0   | 0                  | 0                      | 0.05 |
| arctigenin                 | 1    | 1   | 1                  | 1                      | 0.10 | 1    | 1   | 1                  | 1                      | 0.09 |
| baicalein                  | 3    | 1   | 1                  | 1                      | 2.56 | 3    | 1   | 1                  | 1                      | 2.74 |
| baicalin                   | 2    | 2   | 1                  | 2                      | 1.55 | 2    | 1   | 1                  | 2                      | 1.79 |
| bisdemethoxycurcumin       | 3    | 2   | 0                  | 0                      | 1.18 | 3    | 2   | 0                  | 0                      | 1.02 |
| butein                     | 4    | 2   | 2                  | 2                      | 2.42 | 4    | 2   | 2                  | 2                      | 2.27 |
| caffeic_acid               | 2    | 2   | 2                  | 2                      | 1.31 | 2    | 2   | 2                  | 2                      | 1.24 |
| catechin                   | 5    | 2   | 3                  | 3                      | 3.04 | 5    | 2   | 3                  | 3                      | 2.95 |
| catechin_gallate           | 7    | 5   | 5                  | 5                      | 5.25 | 7    | 5   | 5                  | 5                      | 5.56 |
| chlorogenic_acid           | 2    | 2   | 2                  | 2                      | 1.56 | 2    | 2   | 2                  | 2                      | 1.75 |
| chrysazin                  | 2    | 0   | 0                  | 0                      | 0.07 | 2    | 0   | 0                  | 0                      | 0.06 |
| chrysin                    | 2    | 0   | 0                  | 0                      | 0.08 | 2    | 0   | 0                  | 0                      | 0.05 |
| chrysophanol               | 2    | 0   | 0                  | 0                      | 0.07 | 2    | 0   | 0                  | 0                      | 0.04 |
| corilagin                  | 9    | 9   | 9                  | 9                      | 7.76 | 9    | 9   | 9                  | 9                      | 6.98 |
| curcumin                   | 3    | 3   | 2                  | 2                      | 2.24 | 3    | 3   | 2                  | 2                      | 2.02 |
| daidzein                   | 2    | 1   | 0                  | 0                      | 0.10 | 2    | 1   | 0                  | 0                      | 0.03 |
| daidzin                    | 1    | 1   | 0                  | 0                      | 0.07 | 1    | 1   | 0                  | 0                      | 0.04 |
| demethoxycurcumin          | 3    | 2   | 1                  | 1                      | 1.63 | 3    | 2   | 1                  | 1                      | 1.48 |
| emodin                     | 3    | 0   | 0                  | 0                      | 0.10 | 3    | 0   | 0                  | 0                      | 0.03 |
| epicatechin                | 5    | 2   | 3                  | 3                      | 3.08 | 5    | 2   | 3                  | 3                      | 3.18 |
| epicatechin_gallate        | 7    | 5   | 5                  | 5                      | 5.29 | 7    | 5   | 5                  | 5                      | 5.26 |
| epigallocatechin           | 6    | 3   | 4                  | 4                      | 3.71 | 6    | 3   | 4                  | 4                      | 3.56 |
| epigallocatechin_gallate   | 8    | 6   | 6                  | 6                      | 5.95 | 8    | 6   | 6                  | 6                      | 6.09 |
| esculetin                  | 2    | 2   | 2                  | 2                      | 2.38 | 2    | 2   | 2                  | 2                      | 2.08 |
| esculin                    | 1    | 0   | 1                  | 1                      | 0.16 | 1    | 0   | 1                  | 1                      | 0.17 |
| ferulic_acid               | 1    | 1   | 1                  | 1                      | 1.92 | 1    | 1   | 0                  | 1                      | 1.49 |
| galangin                   | 3    | 1   | 1                  | 1                      | 1.12 | 3    | 1   | 1                  | 0                      | 0.71 |
| gallic_acid                | 3    | 3   | 3                  | 3                      | 3.52 | 3    | 3   | 3                  | 3                      | 3.92 |
| genistein                  | 3    | 1   | 0                  | 0                      | 0.12 | 3    | 1   | 0                  | 0                      | 0.10 |
| genistin                   | 2    | 1   | 0                  | 0                      | 0.08 | 2    | 1   | 0                  | 0                      | 0.03 |
| glycitein                  | 2    | 2   | 1                  | 1                      | 0.10 | 2    | 1   | 1                  | 1                      | 0.02 |
| hesperidin                 | 2    | 1   | 1                  | 1                      | 0.10 | 2    | 1   | 1                  | 1                      | 0.08 |
| hesperitin                 | 3    | 1   | 1                  | 1                      | 0.40 | 3    | 1   | 1                  | 1                      | 0.27 |
| isoferulic_acid            | 1    | 1   | 1                  | 1                      | 1.53 | 1    | 1   | 1                  | 1                      | 1.24 |
| juglone                    | 1    | 0   | 1                  | 0                      | 0.11 | 1    | 0   | 0                  | 0                      | 0.09 |
| kaempferol                 | 4    | 1   | 1                  | 1                      | 1.59 | 4    | 1   | 1                  | 1                      | 1.32 |
| kaempferol-3-glucoside     | 3    | 0   | 1                  | 0                      | 0.14 | 3    | 0   | 1                  | 0                      | 0.15 |
| luteolin                   | 4    | 2   | 2                  | 2                      | 2.18 | 4    | 2   | 2                  | 2                      | 2.24 |
| luteolin-7-glucoside       | 3    | 2   | 2                  | 2                      | 1.47 | 3    | 2   | 2                  | 2                      | 1.39 |
| m-coumaric_acid            | 1    | 0   | 0                  | 0                      | 0.82 | 1    | 0   | 0                  | 0                      | 0.75 |
| m-hydroxybenzoic_acid      | 1    | 0   | 0                  | 0                      | 0.03 | 1    | 0   | 0                  | 0                      | 0.07 |
| magnolol                   | 2    | 2   | 2                  | 2                      | 0.21 | 2    | 2   | 2                  | 2                      | 0.20 |
| matairesinol               | 2    | 2   | 2                  | 2                      | 0.25 | 2    | 2   | 2                  | 2                      | 0.21 |
| morin                      | 5    | 1   | 2                  | 0                      | 2.68 | 5    | 1   | 1                  | 0                      | 2.75 |

|                                    |       |       |       |       |      |       |       |       |       |      |
|------------------------------------|-------|-------|-------|-------|------|-------|-------|-------|-------|------|
| naringenin                         | 3     | 1     | 0     | 0     | 0.22 | 3     | 1     | 0     | 0     | 0.14 |
| naringin                           | 2     | 0     | 0     | 0     | 0.10 | 2     | 0     | 0     | 0     | 0.08 |
| o-coumaric_acid                    | 1     | 1     | 1     | 1     | 0.93 | 1     | 1     | 1     | 1     | 0.84 |
| o-hydroxybenzoic_acid              | 1     | 0     | 0     | 0     | 0.04 | 1     | 0     | 0     | 0     | 0.05 |
| p-coumaric_acid                    | 1     | 1     | 0     | 0     | 1.96 | 1     | 1     | 0     | 0     | 1.44 |
| p-hydroxybenzoic_acid              | 1     | 0     | 0     | 0     | 0.03 | 1     | 0     | 0     | 0     | 0.06 |
| phloretin                          | 4     | 1     | 0     | 0     | 1.79 | 4     | 1     | 0     | 0     | 1.24 |
| physcion                           | 2     | 0     | 0     | 0     | 0.07 | 2     | 0     | 0     | 0     | 0.07 |
| piceatannol                        | 4     | 2     | 2     | 2     | 2.53 | 4     | 2     | 2     | 2     | 2.35 |
| piceatannol-3p-glucoside           | 3     | 1     | 1     | 1     | 1.62 | 3     | 1     | 1     | 1     | 1.55 |
| procyanidin_B1                     | 10    | 5     | 6     | 6     | 6.14 | 10    | 4     | 5     | 6     | 5.94 |
| procyanidin_B2-digallate           | 14    | 10    | 9     | 10    | 9.18 | 14    | 10    | 9     | 10    | 8.79 |
| procyanidin_C1                     | 15    | 8     | 9     | 9     | 8.29 | 15    | 7     | 9     | 9     | 7.93 |
| protocatechuic_acid                | 2     | 2     | 2     | 2     | 1.15 | 2     | 2     | 2     | 2     | 1.29 |
| pseudopurpurin                     | 3     | 2     | 1     | 2     | 1.62 | 3     | 2     | 1     | 1     | 1.70 |
| purpurin                           | 3     | 1     | 1     | 1     | 1.93 | 3     | 1     | 1     | 1     | 2.00 |
| quercetin                          | 5     | 3     | 3     | 3     | 4.42 | 5     | 3     | 3     | 2     | 4.60 |
| quercetin-3-glucoside              | 4     | 2     | 3     | 2     | 2.39 | 4     | 2     | 3     | 2     | 2.16 |
| quercetin-3-glucoside-7-rhamnoside | 3     | 2     | 2     | 2     | 1.56 | 3     | 2     | 2     | 2     | 1.63 |
| quercitrin                         | 4     | 2     | 3     | 2     | 2.18 | 4     | 1     | 3     | 2     | 2.57 |
| quinizarin                         | 2     | 0     | 2     | 2     | 0.55 | 2     | 0     | 2     | 2     | 0.04 |
| resveratrol                        | 3     | 1     | 0     | 1     | 2.14 | 3     | 1     | 0     | 1     | 1.71 |
| resveratrol-3-glucoside            | 2     | 1     | 0     | 1     | 1.35 | 2     | 1     | 0     | 1     | 1.21 |
| resveratrol-4p-glucoside           | 2     | 0     | 0     | 0     | 0.56 | 2     | 0     | 0     | 0     | 0.62 |
| rhein                              | 2     | 0     | 0     | 0     | 0.08 | 2     | 0     | 0     | 0     | 0.06 |
| ruberythric_acid                   | 1     | 0     | 1     | 1     | 0.07 | 1     | 0     | 1     | 1     | 0.07 |
| rutin                              | 4     | 2     | 3     | 2     | 2.02 | 4     | 2     | 3     | 2     | 2.33 |
| sappanchalcone                     | 3     | 2     | 2     | 2     | 1.93 | 3     | 2     | 2     | 2     | 1.82 |
| scopoletin                         | 1     | 1     | 1     | 1     | 0.38 | 1     | 1     | 1     | 1     | 0.21 |
| secoisolariciresinol               | 2     | 2     | 2     | 2     | 0.31 | 2     | 2     | 0     | 2     | 0.18 |
| shikonin                           | 2     | 0     | 1     | 2     | 0.12 | 2     | 0     | 1     | 1     | 0.08 |
| syringic_acid                      | 1     | 1     | 1     | 1     | 1.39 | 1     | 1     | 1     | 1     | 1.33 |
| trolox                             | 1     | 1     | 0     | 1     | 1.00 | 1     | 1     | 0     | 1     | 1.00 |
| vanillic_acid                      | 1     | 1     | 1     | 1     | 0.09 | 1     | 1     | 1     | 1     | 0.06 |
| vitexin                            | 3     | 0     | 1     | 0     | 0.22 | 3     | 0     | 1     | 0     | 0.21 |
| r <sup>2</sup>                     | 0.817 | 0.856 | 0.836 | 0.832 |      | 0.807 | 0.827 | 0.831 | 0.823 |      |
| slope                              | 0.692 | 0.940 | 0.894 | 0.877 |      | 0.677 | 0.936 | 0.877 | 0.858 |      |

Supplementary Table S2. The compounds total OH-groups, OH-groups classified as active in radical scavenging reactions of ABTS and DPPH antiradical capacity assays by BDE, maxSD<sub>c</sub> and BDE×maxSD<sub>c</sub> and respective models correlation coefficients and slopes. The presented data are obtained for the non-chroman subgroup of the dataset in AM1 simulation without COSMO solvent effect corrections.

| compound                   | ABTS  |       |                    |                        |      | DPPH  |       |                    |                        |      |
|----------------------------|-------|-------|--------------------|------------------------|------|-------|-------|--------------------|------------------------|------|
|                            | nOH   | BDE   | maxSD <sub>c</sub> | BDE×maxSD <sub>c</sub> | TEAC | nOH   | BDE   | maxSD <sub>c</sub> | BDE×maxSD <sub>c</sub> | TEAC |
| 1,5-dihydroxyanthraquinone | 2     | 0     | 0                  | 0                      | 0.08 | 2     | 0     | 0                  | 0                      | 0.07 |
| 2,4-dihydroxybenzoic_acid  | 2     | 0     | 0                  | 0                      | 1.22 | 2     | 0     | 0                  | 0                      | 1.27 |
| 2,6-dihydroxyanthraquinone | 2     | 0     | 0                  | 0                      | 0.07 | 2     | 0     | 0                  | 0                      | 0.08 |
| acetylshikonin             | 2     | 0     | 1                  | 1                      | 0.11 | 2     | 0     | 0                  | 0                      | 0.08 |
| alizarin                   | 2     | 1     | 1                  | 1                      | 1.07 | 2     | 1     | 1                  | 1                      | 1.05 |
| alizarin-2-glucoside       | 1     | 0     | 1                  | 1                      | 0.11 | 1     | 0     | 1                  | 1                      | 0.10 |
| aloe-emodin                | 2     | 0     | 0                  | 0                      | 0.08 | 2     | 0     | 0                  | 0                      | 0.04 |
| arctigenin                 | 1     | 1     | 1                  | 1                      | 0.10 | 1     | 1     | 1                  | 1                      | 0.09 |
| bisdemethoxycurcumin       | 3     | 2     | 0                  | 0                      | 1.18 | 3     | 2     | 0                  | 0                      | 1.02 |
| butein                     | 4     | 2     | 2                  | 2                      | 2.42 | 4     | 2     | 2                  | 2                      | 2.27 |
| caffeic_acid               | 2     | 2     | 2                  | 2                      | 1.31 | 2     | 2     | 2                  | 2                      | 1.24 |
| chlorogenic_acid           | 2     | 2     | 2                  | 2                      | 1.56 | 2     | 2     | 2                  | 2                      | 1.75 |
| chrysazin                  | 2     | 0     | 0                  | 0                      | 0.07 | 2     | 0     | 0                  | 0                      | 0.06 |
| chrysophanol               | 2     | 0     | 0                  | 0                      | 0.07 | 2     | 0     | 0                  | 0                      | 0.04 |
| corilagin                  | 9     | 8     | 9                  | 9                      | 7.76 | 9     | 7     | 9                  | 9                      | 6.98 |
| curcumin                   | 3     | 3     | 2                  | 2                      | 2.24 | 3     | 3     | 2                  | 2                      | 2.02 |
| demethoxycurcumin          | 3     | 2     | 1                  | 1                      | 1.63 | 3     | 2     | 1                  | 1                      | 1.48 |
| emodin                     | 3     | 0     | 0                  | 0                      | 0.10 | 3     | 0     | 0                  | 0                      | 0.03 |
| ferulic_acid               | 1     | 1     | 1                  | 1                      | 1.92 | 1     | 1     | 1                  | 1                      | 1.49 |
| gallic_acid                | 3     | 3     | 3                  | 3                      | 3.52 | 3     | 3     | 3                  | 3                      | 3.92 |
| isoferulic_acid            | 1     | 1     | 1                  | 1                      | 1.53 | 1     | 1     | 1                  | 1                      | 1.24 |
| juglone                    | 1     | 0     | 1                  | 0                      | 0.11 | 1     | 0     | 0                  | 0                      | 0.09 |
| m-coumaric_acid            | 1     | 0     | 0                  | 0                      | 0.82 | 1     | 0     | 0                  | 0                      | 0.75 |
| m-hydroxybenzoic_acid      | 1     | 0     | 0                  | 0                      | 0.03 | 1     | 0     | 0                  | 0                      | 0.07 |
| magnolol                   | 2     | 1     | 2                  | 2                      | 0.21 | 2     | 0     | 2                  | 2                      | 0.20 |
| matairesinol               | 2     | 2     | 2                  | 2                      | 0.25 | 2     | 2     | 2                  | 2                      | 0.21 |
| o-coumaric_acid            | 1     | 1     | 1                  | 1                      | 0.93 | 1     | 1     | 1                  | 1                      | 0.84 |
| o-hydroxybenzoic_acid      | 1     | 0     | 0                  | 0                      | 0.04 | 1     | 0     | 0                  | 0                      | 0.05 |
| p-coumaric_acid            | 1     | 1     | 0                  | 0                      | 1.96 | 1     | 0     | 0                  | 0                      | 1.44 |
| p-hydroxybenzoic_acid      | 1     | 0     | 0                  | 0                      | 0.03 | 1     | 0     | 0                  | 0                      | 0.06 |
| phloretin                  | 4     | 1     | 0                  | 0                      | 1.79 | 4     | 1     | 0                  | 0                      | 1.24 |
| physcion                   | 2     | 0     | 0                  | 0                      | 0.07 | 2     | 0     | 0                  | 0                      | 0.07 |
| piceatannol                | 4     | 2     | 2                  | 2                      | 2.53 | 4     | 2     | 2                  | 2                      | 2.35 |
| piceatannol-3p-glucoside   | 3     | 1     | 1                  | 1                      | 1.62 | 3     | 1     | 1                  | 1                      | 1.55 |
| protocatechuic_acid        | 2     | 2     | 2                  | 2                      | 1.15 | 2     | 2     | 2                  | 2                      | 1.29 |
| pseudopurpurin             | 3     | 2     | 1                  | 1                      | 1.62 | 3     | 2     | 1                  | 1                      | 1.70 |
| purpurin                   | 3     | 1     | 1                  | 1                      | 1.93 | 3     | 1     | 1                  | 1                      | 2.00 |
| quinizarin                 | 2     | 0     | 2                  | 2                      | 0.55 | 2     | 0     | 2                  | 2                      | 0.04 |
| resveratrol                | 3     | 1     | 0                  | 1                      | 2.14 | 3     | 1     | 0                  | 0                      | 1.71 |
| resveratrol-3-glucoside    | 2     | 1     | 0                  | 1                      | 1.35 | 2     | 1     | 0                  | 0                      | 1.21 |
| resveratrol-4p-glucoside   | 2     | 0     | 0                  | 0                      | 0.56 | 2     | 0     | 0                  | 0                      | 0.62 |
| rhein                      | 2     | 0     | 0                  | 0                      | 0.08 | 2     | 0     | 0                  | 0                      | 0.06 |
| ruberythric_acid           | 1     | 0     | 1                  | 1                      | 0.07 | 1     | 0     | 1                  | 1                      | 0.07 |
| sappanchalcone             | 3     | 2     | 2                  | 2                      | 1.93 | 3     | 2     | 2                  | 2                      | 1.82 |
| secoisolariciresinol       | 2     | 2     | 2                  | 2                      | 0.31 | 2     | 2     | 1                  | 2                      | 0.18 |
| shikonin                   | 2     | 0     | 1                  | 1                      | 0.12 | 2     | 0     | 1                  | 0                      | 0.08 |
| syringic_acid              | 1     | 1     | 1                  | 1                      | 1.39 | 1     | 1     | 1                  | 1                      | 1.33 |
| vanillic_acid              | 1     | 1     | 1                  | 1                      | 0.09 | 1     | 1     | 1                  | 1                      | 0.06 |
| r <sup>2</sup>             | 0.649 | 0.778 | 0.600              | 0.648                  |      | 0.624 | 0.753 | 0.643              | 0.632                  |      |
| slope                      | 0.803 | 0.856 | 0.712              | 0.744                  |      | 0.736 | 0.841 | 0.685              | 0.672                  |      |

Supplementary Table S3. The compounds total OH-groups, OH-groups classified as active in radical scavenging reactions of ABTS and DPPH antiradical capacity assays by BDE, maxSD<sub>c</sub> and BDE×maxSD<sub>c</sub> and respective models correlation coefficients and slopes. The presented data are obtained for the chroman subgroup of the dataset in AM1 simulation without COSMO solvent effect corrections.

| compound                           | ABTS  |       |                    |                        |      | DPPH  |       |                    |                        |      |
|------------------------------------|-------|-------|--------------------|------------------------|------|-------|-------|--------------------|------------------------|------|
|                                    | nOH   | BDE   | maxSD <sub>c</sub> | BDE×maxSD <sub>c</sub> | TEAC | nOH   | BDE   | maxSD <sub>c</sub> | BDE×maxSD <sub>c</sub> | TEAC |
| 3-hydroxyflavon                    | 1     | 1     | 0                  | 0                      | 0.71 | 1     | 1     | 0                  | 0                      | 0.48 |
| apigenin                           | 3     | 0     | 0                  | 0                      | 0.09 | 3     | 0     | 0                  | 0                      | 0.04 |
| apigenin                           | 2     | 0     | 0                  | 0                      | 0.08 | 2     | 0     | 0                  | 0                      | 0.05 |
| baicalein                          | 3     | 1     | 1                  | 1                      | 2.56 | 3     | 1     | 1                  | 1                      | 2.74 |
| baicalin                           | 2     | 2     | 1                  | 2                      | 1.55 | 2     | 2     | 1                  | 2                      | 1.79 |
| catechin                           | 5     | 2     | 3                  | 3                      | 3.04 | 5     | 2     | 3                  | 3                      | 2.95 |
| catechin_gallate                   | 7     | 5     | 5                  | 5                      | 5.25 | 7     | 5     | 5                  | 5                      | 5.56 |
| chrysin                            | 2     | 0     | 0                  | 0                      | 0.08 | 2     | 0     | 0                  | 0                      | 0.05 |
| daidzein                           | 2     | 1     | 0                  | 0                      | 0.10 | 2     | 1     | 0                  | 0                      | 0.03 |
| daidzin                            | 1     | 1     | 0                  | 0                      | 0.07 | 1     | 1     | 0                  | 0                      | 0.04 |
| epicatechin                        | 5     | 2     | 3                  | 3                      | 3.08 | 5     | 2     | 2                  | 3                      | 3.18 |
| epicatechin_gallate                | 7     | 5     | 5                  | 5                      | 5.29 | 7     | 5     | 5                  | 5                      | 5.26 |
| epigallocatechin                   | 6     | 3     | 4                  | 4                      | 3.71 | 6     | 3     | 4                  | 4                      | 3.56 |
| epigallocatechin_gallate           | 8     | 6     | 6                  | 6                      | 5.95 | 8     | 6     | 6                  | 6                      | 6.09 |
| esculetin                          | 2     | 2     | 2                  | 2                      | 2.38 | 2     | 2     | 2                  | 2                      | 2.08 |
| esculin                            | 1     | 0     | 1                  | 1                      | 0.16 | 1     | 0     | 1                  | 1                      | 0.17 |
| galangin                           | 3     | 1     | 1                  | 1                      | 1.12 | 3     | 1     | 1                  | 1                      | 0.71 |
| genistein                          | 3     | 1     | 0                  | 0                      | 0.12 | 3     | 1     | 0                  | 0                      | 0.10 |
| genistin                           | 2     | 1     | 0                  | 0                      | 0.08 | 2     | 1     | 0                  | 0                      | 0.03 |
| glycitein                          | 2     | 2     | 1                  | 1                      | 0.10 | 2     | 2     | 1                  | 1                      | 0.02 |
| hesperidin                         | 2     | 1     | 1                  | 1                      | 0.10 | 2     | 1     | 1                  | 1                      | 0.08 |
| hesperitin                         | 3     | 1     | 1                  | 1                      | 0.40 | 3     | 1     | 1                  | 1                      | 0.27 |
| kaempferol                         | 4     | 1     | 1                  | 2                      | 1.59 | 4     | 1     | 1                  | 1                      | 1.32 |
| kaempferol-3-glucoside             | 3     | 0     | 1                  | 0                      | 0.14 | 3     | 0     | 0                  | 0                      | 0.15 |
| luteolin                           | 4     | 2     | 2                  | 2                      | 2.18 | 4     | 2     | 2                  | 2                      | 2.24 |
| luteolin-7-glucoside               | 3     | 2     | 2                  | 2                      | 1.47 | 3     | 2     | 2                  | 2                      | 1.39 |
| morin                              | 5     | 1     | 1                  | 2                      | 2.68 | 5     | 1     | 1                  | 1                      | 2.75 |
| naringenin                         | 3     | 1     | 0                  | 0                      | 0.22 | 3     | 1     | 0                  | 0                      | 0.14 |
| naringin                           | 2     | 0     | 0                  | 0                      | 0.10 | 2     | 0     | 0                  | 0                      | 0.08 |
| procyanidin_B1                     | 10    | 6     | 6                  | 6                      | 6.14 | 10    | 4     | 5                  | 6                      | 5.94 |
| procyanidin_B2-digallate           | 14    | 10    | 9                  | 10                     | 9.18 | 14    | 10    | 9                  | 10                     | 8.79 |
| procyanidin_C1                     | 15    | 8     | 9                  | 9                      | 8.29 | 15    | 8     | 9                  | 9                      | 7.93 |
| quercetin                          | 5     | 3     | 3                  | 3                      | 4.42 | 5     | 3     | 3                  | 3                      | 4.60 |
| quercetin-3-glucoside              | 4     | 2     | 3                  | 2                      | 2.39 | 4     | 2     | 3                  | 2                      | 2.16 |
| quercetin-3-glucoside-7-rhamnoside | 3     | 2     | 2                  | 2                      | 1.56 | 3     | 2     | 2                  | 2                      | 1.63 |
| quercitrin                         | 4     | 2     | 3                  | 2                      | 2.18 | 4     | 2     | 3                  | 2                      | 2.57 |
| rutin                              | 4     | 2     | 3                  | 2                      | 2.02 | 4     | 2     | 3                  | 2                      | 2.33 |
| scopoletin                         | 1     | 1     | 1                  | 1                      | 0.38 | 1     | 1     | 1                  | 1                      | 0.21 |
| trolox                             | 1     | 1     | 0                  | 1                      | 1.00 | 1     | 1     | 0                  | 1                      | 1.00 |
| vitexin                            | 3     | 0     | 1                  | 0                      | 0.22 | 3     | 0     | 1                  | 0                      | 0.21 |
| r <sup>2</sup>                     | 0.876 | 0.900 | 0.921              | 0.950                  |      | 0.854 | 0.865 | 0.903              | 0.925                  |      |
| slope                              | 0.697 | 1.002 | 0.965              | 0.954                  |      | 0.684 | 1.008 | 0.961              | 0.931                  |      |
